# Supplementary material for: Correlation of serum apolipoprotein B with the Framingham Risk Score among a group of Iraqi subjects: a cross-sectional study
Source: PeerJ. 2025 Aug 18;13:e19883. doi: 10.7717/peerj.19883 (PMC12369600; doi:10.7717/peerj.19883)
Supplement: Supplemental Information 1 [file peerj-13-19883-s001.xlsx]

## Sheet: Sheet1
			sex	age	Physical activity	BMI	vitD	TC	TG	HDL-C	LDL-C	VLDL-C	non-HDL-C	diastoic BP1	systolic BP1	HT	smoking	FRS	Apo B	TC2	HDL-C2	TG2	VLDL-C2	non-HDL-C2	LDL-C2	vit D 2	diastolic BP2	systolic BP2	Apo B2	FRS2
			2	32	1	30.9917	3	186	74	44.5	126.7	14.8	141.5	63	117	0	1	3	108.3	177	49	71	14.2	128	113.8	31	73	118	95.9	2
			2	32	1	39.8503	3.8	205	310	39	104	62	166	73	133	0	0	1	120	198.8	40.2	250	50	158.6	108.5	16.4	73	110	117	1
			1	30	1	28.257	4.7	189	140	37.8	123.2	28	151.2	80	134	0	0	1	80.3	173	24	173	34.6	149	114.4	24	82	132	75.6	1
			1	52	1	28.7201	5.1	180	74	30.6	134.6	14.8	149.4	60	127	1	0	2	99.2	178	40.1	76	15.2	137.9	122.7	32.1	62	137	73.7	1
			1	34	1	33.3029	5.6	143	71	36.6	92.2	14.2	106.4	72	115	0	1	1	73.6	130	36	65	13	94	81	37	76	123	79.7	1
			1	30	1	32.4622	6.9	189	132	32.5	130.1	26.4	156.5	75	129	0	0	1	58.6	186	35.8	127	25.4	150.2	124.8	24.7	88	139	62.5	1
			1	33	1	36.3281	7.3	175	90	38.9	118.1	18	136.1	84	118	0	0	1	69.2	179.6	42	86	17.2	137.6	120.4	28.3	88	111	70.3	1
			2	57	1	31.8342	7.5	210	197	32	138.6	39.4	178	63	133	1	1	25	294	201	30	193	38.6	171	132.4	29	86	138	280	25
			2	67	1	28.4091	7.6	196	206	35	119.8	41.2	161	90	124	1	1	24	257	199	39	198	39.6	160	120.4	19	77	139	301	22
			1	30	1	35.4191	8	163	143	46	88.4	28.6	117	73	116	0	0	1	73	159	53	138	27.6	106	78.4	36	80	130	68.7	1
			2	33	1	22.1607	8	104	63	36	55.4	12.6	68	74	116	0	0	1	49.7	100.9	37.3	66.5	13.3	63.6	50.3	35.7	79	116	45.6	1
			1	31	1	18.3655	8	142	63	57	72.4	12.6	85	77	121	0	0	1	60.6	129.6	44.4	47	9.4	85.2	75.8	36	77	116	58.9	1
			2	35	1	22.8571	8	170	175	36	99	35	134	68	134	0	0	1	71.3	176	71	80	16	105	89	17	68	120	58.2	1
			1	30	1	22.8928	8	151	69	58	79.2	13.8	93	81	125	0	0	1	201	104.5	39.3	39.2	7.84	65.2	57.4	10.2	73	139	218	1
			2	58	1	26.1738	8	210	200	36	134	40	174	70	134	1	1	25	185	201	41	192	38.4	160	121.6	36	75	140	120	20
			2	34	1	25.1096	8.1	154	82	47	90.6	16.4	107	61	113	0	0	1	103.3	180.7	40.5	118	23.6	140.2	116.4	29.3	73	136	112.7	1
			1	34	1	23.1111	8.1	212	78	58	138.4	15.6	154	79	130	0	0	1	72.6	203.9	48.2	70.9	14.18	155.7	141.6	37.3	80	122	77.9	1
			2	31	1	22.8931	8.2	175	60	55	108	12	120	83	129	0	0	1	73.5	160	42	57	11.4	118	106.6	47.4	87	121	70.1	1
			2	56	1	29.3524	8.3	208	185	37	134	37	171	87	127	1	1	22	263	212	33	202	40.4	179	167.6	29.5	62	130	339	25
			2	60	1	26.1493	8.4	210	113	53.2	134.2	22.6	156.8	61	128	1	1	17	155	203	45	100	20	158	138	36	69	115	160	19
			1	32	1	25.3906	8.6	176	94	51	106.2	18.8	125	65	139	0	0	1	80.8	160.5	32.6	161.7	32.34	127.9	95.5	30.1	68	122	83.7	1
			1	73	1	31.1419	8.6	225	231	26	152.8	46.2	199	88	120	1	1	21	300	218	32	236	47.2	186	166	30.1	80	113	312	17
			2	66	1	31.6374	8.7	201	194	38	124.2	38.8	163	79	136	1	1	23	314	198	41	200	40	157	124.7	55.132	61	135	301	21
			1	45	1	37.0447	8.8	199	180	55	108	36	144	89	132	0	1	2	90.1	193	35.88	200	40	157.12	117.1	26	63	139	98.6	3
			2	58	1	34.7656	8.8	187.8	176	38.9	113.7	35.2	148.9	82	139	1	1	19	150	184	42	174	34.8	142	107.2	29.5	80	123	142	18
			2	71	1	29.3776	8.8	193	201	33	141.2	40.2	160	60	116	1	0	25	340	187	38	189	37.8	149	116.7	35.7	70	119	328	22
			1	35	1	20.8209	8.9	175	61	65	97.8	12.2	110	65	126	0	0	1	49.4	178.6	75.6	47.4	9.48	103	93.6	8.1	73	129	45.1	1
			1	72	1	38.7097	8.9	250	215	28	186.8	43	222	67	121	1	1	21	316	256	27	223	44.6	229	184.4	32	86	130	302	22
			1	33	1	36.7865	9	171	84	57.7	96.5	16.8	113.3	75	119	1	0	1	67.7	192	61	105	21	131	109.9	43	60	110	75.6	1
			1	60	1	32.4219	9	245	180	39.1	169.9	36	205.9	74	125	1	0	6	140.3	230	48	177	35.4	182	146.6	29.6	85	117	119.8	4
			2	62	1	35.8564	9	130	90	28.4	83.6	18	101.6	78	124	0	1	15	148	132	34	81	16.2	98	81.8	33	77	114	143	13
			2	59	1	33.91	9	213	112	50	140.6	22.4	163	77	129	1	1	18	170	230	52	256	51.2	178	123	34	88	130	177	21
			2	55	1	34.187	9	214	207	31	141.6	41.4	183	81	114	0	1	21	185	219	30	200	40	189	149	32	84	115	190	22
			2	68	1	31.7739	9	200	214	31	126.2	42.8	169	81	116	1	0	24	329	185	37	218	43.6	148	104.4	34	80	123	315	20
			1	50	1	31.2213	9.3	199.1	110	50	127.1	22	149.1	78	119	1	1	4	98.5	184	53	170	34	131	97	39	78	113	92.1	4
			2	75	1	23.9395	9.3	151	147	55	66.6	29.4	96	74	113	1	1	15	151	185	53	132	26.4	132	105.6	45	76	129	150	16
			2	33	1	42.9286	9.46	255	459	29.4	133.8	91.8	225.6	74	136	0	0	2	98.6	230	37.9	215	43	192.1	149.1	34.7	67	127	91.8	1
			1	31	1	40.2768	9.5	155	86	51	86.8	17.2	104	73	133	1	0	1	52	150.2	53	90	18	97.2	79.2	30.1	65	138	50.1	1
			1	63	1	42.0606	9.5	200	154	40	129.2	30.8	160	84	120	0	1	6	130	191	38	150	30	153	123	29.5	85	113	127	6
			2	31	1	23.9869	9.6	259	170	42.8	182.2	34	216.2	80	137	0	1	8	139.7	189	41	160	32	148	116	35.11	79	126	95.6	2
			2	50	1	38.0623	9.7	149	125	37	87	25	112	72	111	1	1	10	125	145	43.8	123	24.6	101.2	76.6	40	70	118	122	9
			2	48	1	33.5315	9.7	170	150	35	105	30	135	87	122	0	1	10	145.7	166	41	147	29.4	125	95.6	41.3	83	139	130	8
			1	34	1	32.4675	9.8	135	139	38	69.2	27.8	97	76	124	0	1	1	52.5	197	40	109	21.8	157	180	30.1	64	138	85.6	1
			1	34	1	29.2969	10	145	140	48	69	28	97	61	123	0	0	1	69.873	198	37.8	146	29.2	160.2	171	11.2	72	110	89.7	1
			1	48	1	43.1154	10	170	87	60	92.6	17.4	110	77	132	0	1	1	56.3	210	51.74	84	16.8	158.26	185	43.56	81	121	80.2	2
			1	30	1	37.6493	10	166	77	37.5	113.1	15.4	128.5	72	133	0	0	1	183	130	28.4	90	18	101.6	95	13.1	85	137	160	1
			1	30	1	31.9559	10	210	75	57	138	15	153	79	124	0	1	1	217	199.7	50	73	14.6	149.7	135.1	40.1	77	129	215	1
			1	34	1	34.2504	10	156	128.7	43	87.26	25.74	113	61	131	0	1	1	55.6	147	46	130	26	101	75	36	65	119	61.3	1
			1	30	1	18.2563	10	158	60	59	87	12	99	71	137	0	0	1	50.2	128.4	52.1	62.6	12.52	76.3	63.78	8.1	70	110	48.2	1
			1	34	1	21.4903	10	141	90	44	79	18	97	89	134	0	0	1	225	203	94.6	65.1	13.02	108.4	95.4	32.38	79	121	218	1
			1	54	1	36.3636	10	210	150	42	138	30	168	74	139	0	0	2	55	187	39.1	101	20.2	147.9	159	11.38	74	138	50	1
			1	55	1	35.2508	10	220	140	58	134	28	162	86	129	1	1	6	132.5	206	60	123	24.6	146	121.4	21.4	69	124	111.7	4
			2	30	1	34.9388	10	253	216	36.4	173.4	43.2	216.6	70	132	0	1	10	143.1	249	38	157	31.4	211	179.6	36	70	126	136.2	7
			2	51	1	32.0499	10	142	210	32	68	42	110	73	128	1	1	11	138	141	33	207	41.4	108	66.6	48	70	128	141	11
			2	48	1	34.1725	10	200	120	47.5	128.5	24	152.5	86	126	0	1	11	142.8	189	49	118	23.6	140	116.4	28.8	72	136	139.9	9
			1	70	1	21.2245	10	195.4	99	34	141.6	19.8	161.4	70	133	1	1	13	140	190	30	102	20.4	160	39.6	52	86	132	142	15
			2	55	1	29.0174	10	201	68.3	54	133.34	13.66	147	84	137	1	1	15	155	174.9	55	64.1	12.82	119.9	107.1	16.7	74	118	145	12
			2	68	1	38.7397	10	200	99.7	41	139.06	19.94	159	83	135	0	1	19	234	187.6	38	104	20.8	149.6	128.8	30.1	61	110	239	20
			2	66	1	26.1224	10	240	230	35	159	46	205	82	124	0	1	22	303	234	40	218	43.6	194	150.4	42	80	129	300	19
			2	68	1	31.5115	10	240	270	40	146	54	200	90	134	1	1	24	269	220	51	248	49.6	169	119.4	26	84	134	300	19
			1	30	1	42.9688	10.5	211	163	35.6	142.8	32.6	175.4	84	133	0	0	1	86.9
			1	43	1	36.747	10.7	233	255	36.5	145.5	51	196.5	63	135	0	0	1	78.8
			1	45	1	19.2894	11	207.5	113.5	67	117.8	22.7	140.5	76	128	0	0	1	81.5
			2	61	1	28.4011	11	189	215	30	131	43	159	67	138	1	1	17	129
			1	30	1	36.1323	11.2	159	137	47.1	84.5	27.4	111.9	60	116	0	0	1	185
			1	31	1	29.0174	11.2	201	59	81.2	108	11.8	119.8	80	127	0	0	1	78.5
			1	45	1	41.8793	11.3	158	132	41.8	89.8	26.4	116.2	69	132	1	0	1	74.3
			1	34	1	39.0625	11.3	182	148	33	119.4	29.6	149	77	133	0	0	1	79.8
			1	33	1	22.7615	11.6	144.3	132	69.4	48.5	26.4	74.9	81	119	0	0	1	52.4
			1	36	1	41.0998	11.9	182	81	42.1	123.7	16.2	139.9	72	122	0	0	1	77.1
			1	33	1	27.8852	12	162	72	56	91.6	14.4	106	83	140	0	0	1	56.3
			1	66	1	34.8087	12	207	192	35	140.4	38.4	172	84	133	1	1	12	139
			2	48	1	25.7959	12	208	220	30	134	44	178	79	137	1	1	21	297
			2	35	1	35.6647	12.1	225	98	43	162.4	19.6	182	80	138	0	1	7	146.1
			1	30	1	30.4867	12.7	190	141	41.9	119.9	28.2	148.1	89	121	0	0	1	58
			2	32	1	26.7036	12.7	209	97	64	125.6	19.4	145	77	116	0	0	1	79.6
			1	30	1	23.5294	12.8	149	68	59	76.4	13.6	90	68	115	0	0	1	68.9
			1	33	1	32.3265	12.9	236	95	60	157	19	176	65	110	0	0	1	87.5
			1	45	1	31.2488	13.4	245	104	44	180.2	20.8	201	62	115	1	0	2	83.4
			1	37	1	29.5525	13.6	156	138	50.3	78.1	27.6	105.7	88	115	0	1	1	73.8
			1	32	1	28.6288	13.7	164	88	53	93.4	17.6	111	66	133	0	1	1	60.2
			1	30	1	32.4219	14	149	143	45.7	74.7	28.6	103.3	87	115	0	1	1	68.1
			2	55	1	27.7769	14	200	293	33	108.4	58.6	167	89	115	1	1	22	190
			2	32	1	34.8765	14.2	200	186	45	117.8	37.2	155	84	119	0	1	3	97.5
			2	51	1	36.7381	14.2	199	146	39.1	130.7	29.2	159.9	65	117	0	0	6	132.1
			2	38	1	32.8241	14.5	160	148	38.8	91.6	29.6	121.2	72	123	0	1	1	120
			2	72	1	30.3461	14.6	206	216	35	127.8	43.2	171	65	129	0	1	21	355
			2	32	1	24.1633	14.7	168	95	61.3	87.7	19	106.7	78	111	0	0	1	59.7
			1	33	1	24.3418	15	130	75	50	65	15	80	67	132	0	0	1	52.4
			2	33	1	31.3469	15	182	205	52	89	41	130	88	118	0	1	2	130
			2	34	1	31.8878	15	290	370	37	179	74	253	62	128	1	0	3	95.6
			1	60	1	35.8177	15.5	223	154	68.1	124.1	30.8	154.9	78	135	1	1	6	139.4
			2	30	1	39.5484	15.7	169	111	30.3	116.5	22.2	138.7	84	137	0	1	4	106.3
			2	30	1	25.4327	15.8	231	300	41.6	129.4	60	189.4	63	118	0	1	6	137.8
			2	33	1	44.6163	16.2	187	233	39.7	100.7	46.6	147.3	81	110	0	0	1	216
			2	54	1	33.9844	16.6	206	167	31.1	141.5	33.4	174.9	89	125	1	0	12	143.7
			1	44	1	43.3425	17	200	99	52.9	127.3	19.8	147.1	89	137	0	0	1	84.3
			1	30	1	25.7812	17	248	270	59	135	54	189	79	132	0	0	1	90.2
			1	41	1	39.4421	17.2	167	158	37	98.4	31.6	130	82	117	0	0	1	201
			1	31	1	31.975	17.3	203	287	35.7	109.9	57.4	167.3	68	121	0	1	2	99.2
			2	40	1	32.1929	17.4	186	315	56	67	63	130	69	122	0	1	5	125.1
			1	40	1	41.6651	18	270	226	54	170.8	45.2	216	88	133	1	0	1	83
			1	48	1	34.0176	18	152	117	44	84.6	23.4	108	81	115	0	1	2	113.5
			2	48	1	32.3265	18.4	190	176	55	99.8	35.2	135	72	111	0	1	9	161.2
			1	63	1	30.8012	18.5	201	99	47	134.2	19.8	154	63	138	0	0	3	98.2
			2	47	1	31.0204	18.9	221	237	33.5	140.1	47.4	187.5	75	117	0	1	17	187.5
			2	43	1	29.7004	19	159	192	39	81.6	38.4	120	74	129	0	0	1	69.8
			2	67	1	30.3233	20	210	238	41	121.4	47.6	169	90	120	1	0	19	220
			1	32	1	42.4611	20.4	310	720	41.4	124.6	144	268.6	81	126	0	0	1	94.6
			2	32	1	27.4587	20.8	250	201	59	150.7	40.2	191	69	110	0	1	6	130.1
			2	50	1	24.3025	21	188	99	55	113.2	19.8	133	77	131	0	0	4	147
			1	37	1	29.7619	21.9	191	117	48.1	119.5	23.4	142.9	86	111	0	1	1	117
			1	73	1	34.8087	22.3	170	169	49.8	86.4	33.8	120.2	74	137	1	1	9	145.2
			1	49	1	34.3351	22.8	173	84	43.9	112.3	16.8	129.1	61	114	0	0	1	84.4
			2	43	1	28.0816	22.9	253	189	41	147.2	37.8	212	73	117	0	0	5	127.5
			1	45	1	33.834	23	114	89	41.5	54.7	17.8	72.5	62	135	0	0	1	55.2
			2	35	1	32.6531	23.6	287	290	50	179	58	237	75	140	1	0	3	75
			1	41	1	33.7604	23.7	221	136	54.3	139.5	27.2	166.7	80	127	0	0	1	77
			1	41	1	28.3039	23.9	181	96	30	131.8	19.2	151	62	115	0	0	1	78.6
			2	47	1	44.7347	23.9	238	240	25	165	48	213	64	128	0	0	9	139.6
			1	51	1	30.863	24	188	156	52	104.8	31.2	136	77	112	0	0	1	78.5
			2	43	1	37.6184	24	290	413	44	163.4	82.6	246	84	123	0	1	23	286.5
			1	41	1	34.049	24.6	156	141	29	98.8	28.2	127	85	124	0	1	1	78.5
			2	33	1	35.713	24.7	178	115	39	116	23	139	66	130	0	0	1	89.5
			1	55	1	28.9341	24.9	255	343	45	141.4	68.6	210	79	126	1	0	4	195.2
			1	39	1	39.6571	25	210	121	37	148.8	24.2	173	71	137	0	0	1	65.2
			1	53	1	35.9954	25.1	207	198	51	116.4	39.6	156	71	139	1	1	6	139.4
			2	43	1	27.4648	25.7	184	95	55	110	19	129	79	125	1	0	2	150
			1	71	1	27.6398	26	192	106	48	122.8	21.2	144	84	119	0	1	6	133.6
			2	69	1	32.4219	26	240	210	30	168	42	210	60	113	0	1	25	285
			1	37	1	32.8933	26.2	187	192	50	98.2	38.4	137	63	113	0	1	1	73
			1	75	1	34.3679	27	240	190	25	177	38	215	63	138	1	1	24	281
			2	47	1	44.7347	27.9	238	340	25	145	68	213	70	114	0	0	9	132.4
			1	76	1	31.9922	28	240	199	28	172.2	39.8	212	88	116	1	1	21	340
			2	60	1	33.218	28	247	248	20	177.4	49.6	227	85	132	1	0	30	203
			1	50	1	35.7495	29	166	187	41	87.6	37.4	125	78	131	0	0	1	77.5
			1	34	1	26.4381	29	165	95	43	103	19	122	77	139	0	1	1	76.7
			1	65	1	31.6443	29	250	312	37	150.6	62.4	213	64	111	1	0	8	128
			1	41	1	35.2183	29.6	173	163	43.4	97	32.6	129.6	89	113	0	0	1	190
			1	42	1	36.2123	30	198.7	109	42	134.9	21.8	156.7	79	114	0	1	3	94.6	200	40	112	22.4	160	137.6	30.4	65	126	98.5	3
			1	63	1	30.8185	30	270	357	43	155.6	71.4	227	80	128	1	0	7	138.6
			1	65	1	31.6443	30	240	251	37	152.8	50.2	203	60	121	1	0	8	145.6
			2	63	1	29.7458	30	197.6	187.3	52	108.14	37.46	145.6	86	111	1	0	13	147.1	135	42	215	43	93	59	40	90	121	142.659	11
			2	65	1	26.1224	30.1	210	144	42	139.2	28.8	168	65	129	1	0	17	213.5	205	42	138	27.6	163	134.9	32	69	114	220.1	18
			2	72	1	33.2031	30.2	230	142	48	153.6	28.4	182	62	130	1	1	21	325	213	42	135	27	171	170	34	61	111	340	23
			2	77	1	33.6593	30.4	180	210	53	85	42	127	69	111	1	1	21	340	187	48	188	37.6	139	101.4	29	77	122	126.351	23
			2	39	1	34.8944	30.5	200	168.8	35	131.24	33.76	165	79	134	0	1	8	138.6
			2	63	1	34.6021	31	112	279	33.9	22.3	55.8	78.1	72	129	1	0	13	145	110	39	254	50.8	71	20.2	33	67	122	148.163	11
			2	46	1	31.25	31	245	218	31	170.4	43.6	214	89	127	1	1	27	336	235	31	204	40.8	204	163	28.1	65	138	330	25
			2	68	1	25.5036	31.9	244	287	44	142.6	57.4	200	82	116	0	1	18	260.2	239	40	255	51	199	148	29.5	84	121	249.491	19
			1	31	1	35.4979	32	201	143	45.4	127	28.6	155.6	65	112	0	0	1	150	208	40	138	27.6	168	40.4	26	76	121	158	1
			1	63	1	29.7521	32	217.1	198	51.9	125.6	39.6	165.2	62	122	0	1	5	121.4	220	49	186	37.2	171	133.8	31	82	112	125.627	6
			2	63	1	24.1517	32	180	126	34	120.8	25.2	146	65	136	1	1	22	310
			2	58	1	29.4078	32	195	200	30	125	40	165	86	123	1	1	25	317	198	37	190	38	161	123	27.24	80	136	300	21
			2	69	1	32.4219	32	184	227	30	108.6	45.4	154	69	136	1	0	25	328	187	33	252	50.4	154	103.6	29.6	99	128	325	23
			1	78	1	31.6263	33	190	186	25	127.8	37.2	165	65	124	1	0	22	298
			1	48	1	28.9341	33.9	255	443	45	121.4	88.6	210	61	125	1	0	2	86.9
			1	53	1	35.1562	34	171	190	47	86	38	124	84	111	0	1	2	86.3	166	38	182	36.4	128	91.6	34	64	111	89.255	3
			2	37	1	32.9287	34.1	294	322	42	187.6	64.4	252	84	125	0	1	20	274.2
			2	73	1	24.8356	34.9	150	159	38.4	79.8	31.8	111.6	63	110	0	0	18	187.9	144	40.5	148	29.6	103.5	73.9	46.1	61	127	169.618	17
			1	64	1	34.1124	35	238.1	198.3	63.9	134.54	39.66	174.2	82	121	1	0	4	105.7	215	64	215	43	151	108	35.8	96	140	99.582	3
			2	52	1	27.143	35.6	201	190	43	120	38	158	78	140	1	0	8	126.7
			2	62	1	43.2432	35.8	220	133	37.1	156.3	26.6	182.9	85	113	1	1	24	360	217	35.6	161	32.2	181.4	149.2	35	68	123	362	25
			2	61	1	26.1719	36.1	150	177	44.1	70.5	35.4	105.9	73	139	1	1	15	152	147	46	181	36.2	101	64.8	33.7	71	140	150	14
			1	32	1	26.8386	37.6	261	268	31	176.4	53.6	230	69	136	0	0	1	89.3
			2	77	1	34.7656	37.8	197	130	53	118	26	144	73	119	1	1	21	340	200	55	127	25.4	145	119.6	30.7	70	120	345	20
			2	63	1	34.8944	37.89	186	173	70.4	81	34.6	115.6	85	125	1	1	13	139	174.6	66.2	169.4	33.88	108.4	74.5	40.5	71	123	140.8	12
			2	63	1	29.5583	39	130	101	47	62.8	20.2	83	84	120	1	1	13	150	134	44	106	21.2	90	68.8	37	80	116	153	14
			2	63	1	34.5473	39.8	173	237	46	79.6	47.4	127	85	139	1	0	13	139.9
			2	74	1	28.3039	40	212.9	124.6	50.4	137.58	24.92	162.5	84	134	1	1	21	336	209	55	130	26	154	128	42.3	98	126	330	19
			2	72	1	32.7186	40	213	185.7	41.2	134.66	37.14	171.8	84	114	1	1	23	341	218	47	193.6	38.72	171	132.2	38.3	89	133	240	21
			2	71	1	29.9836	40.2	146.8	203.8	49.3	56.74	40.76	97.5	90	119	1	0	17	155	150.6	41	199	39.8	109.6	69.8	33.7	91	120	295.2	20
			2	50	1	40.7407	40.4	320	442	50	181.6	88.4	270	69	136	0	0	11	264.4
			2	46	1	31.5115	42	146.6	257	40.8	54.4	51.4	105.8	83	123	1	1	7	137.9	154	33	236	47.2	121	73.8	37	82	118	138	9
			2	66	1	43.3425	43	210	84	51.7	141.5	16.8	158.3	88	133	1	1	18	162	206	49	97	19.4	157	137.6	40	89	131	271	19
			1	54	1	26.9531	44.4	173.2	117.6	53.8	95.88	23.52	119.4	74	123	1	1	4	109.4	170.1	49	125.6	25.12	121.1	96	46.1	78	139	103.2	4
			2	63	1	30.4688	45	233	167	45	154.6	33.4	188	88	124	1	0	16	152	230	41	153	30.6	189	158.4	40.6	93	120	155	18
			2	66	1	30.8642	45	171	74	42.8	113.4	14.8	128.2	82	131	1	n	16	164	180	39	81	16.2	141	124.8	39	92	134	165	17
			2	63	1	29.7143	47	186	139	61	97.2	27.8	125	69	128	1	0	11	141.2	179	51	156	31.2	128	96.8	38	97	131	142.1	12
			2	36	1	25.8264	47	218.1	213.3	34.7	140.74	42.66	183.4	68	112	1	1	11	145.2	210	42	199.7	39.94	168	128.1	44.5	73	131	149.963	8
			2	51	1	26.5285	47	173	97	37	116.6	19.4	136	63	120	0	1	11	98
			1	38	1	29.7339	48.2	238	426	53	99.8	85.2	185	62	133	0	0	1	135.7
			1	68	1	32.6905	48.8	194	125.3	68.9	100.04	25.06	125.1	72	123	1	0	4	97.5	201	58	118	23.6	143	119.4	44.2	81	123	111.473	5
			1	49	1	32.7369	48.9	198	230	32	120	46	166	83	118	0	1	5	128.9	200	30	258	51.6	170	118.4	43	85	116	127.937	5
			2	53	1	36.4133	48.9	257	330	32	159	66	225	60	119	1	1	30	359	261	46	228	45.6	215	169.4	44.5	89	120	321.691	25
			1	69	1	34.1598	49	241	194	33	169.2	38.8	208	68	129	1	1	16	138
			2	49	1	31.1614	50	192	168	41	117.4	33.6	151	85	116	0	1	12	118
			1	52	1	25.2363	51.7	242	280	37	149	56	205	62	122	1	0	3	128.2
			1	39	1	29.7339	52	201	168	54	113.4	33.6	147	85	123	0	1	2	55
			2	70	1	34.6268	54	201	120	59	118	24	142	79	111	0	1	13	108
			2	45	1	29.4118	54.8	250	224	35	170.2	44.8	215	81	139	1	1	25	291
			1	48	1	30.0621	55	169	127	44	99.6	25.4	125	89	139	0	0	1	72.2
			1	52	1	34.9277	56	298.4	107	45	232	21.4	253.4	64	119	1	0	4	104.6	287	40	98	19.6	247	226.4	52	71	113	117.2	5
			2	66	1	24.1588	57.9	170	72	63	92.6	14.4	107	67	117	1	1	13	144	177	55	68	13.6	122	108.4	55.2	69	134	97	15
			2	46	1	28.7347	58	200	204	47	112.2	40.8	153	79	119	0	1	10	157	189	42	220	44	147	133	49	76	113	155.4	10
			2	30	1	33.0247	58.3	245	380	57	112	76	188	69	123	0	0	1	83.6	239	49	279	55.8	190	134.2	51	79	113	79.3	1
			2	35	1	30.8642	59.5	204	107	48.7	133.9	21.4	155.3	87	112	0	0	1	75.4	171	42.81	74	14.8	128.19	143	44.74	62	111	95.2361	1
			2	50	1	30.8532	60	114.2	211.9	32.3	39.52	42.38	81.9	86	135	1	0	3	88.3	121	35	102	20.4	86	65.6	56	65	119	85.7	3
			1	67	1	30.9617	61.9	116	98.1	47.1	49.28	19.62	68.9	77	118	1	0	2	117.4	115	48	94	18.8	67	48.2	59	66	137	116.391	2
			2	37	1	26.2346	65	208	322	42	101.6	64.4	166	81	113	0	1	7	124.8
			1	40	1	29.7211	74	180	152	48	101.6	30.4	132	74	120	0	1	1	197
			1=Female, 2=Male		1=Light, 2= moderate, 3= vigorous											1=Hypertension, 0= normotension	1= Smoker, 0= non-Smoker
